# Supplementary material for: Heterometallic clusters based on an uncommon asymmetric “V-shaped” [Fe3+(μ-OR)Ln3+(μ-OR)2Fe3+]6+ (Ln = Gd, Tb, Dy, Ho) structural core and the investigation of the slow relaxation of the magnetization behaviour of the [Fe2Dy] analogue
Source: Royal Society of Chemistry journal article supplement (doi:10.1039/d2dt03938a), 2023-01-01
Supplement: d2dt03938a1.pdf [file d2dt03938a1.pdf]

## ELECTRONIC SUPPORTING INFORMATION (ESI)

**Heterometallic clusters based on an uncommon asymmetric “V-shaped”  $[\text{Fe}^{3+}(\mu\text{-OR})\text{Ln}^{3+}(\mu\text{-OR})_2\text{Fe}^{3+}]^{6+}$  (Ln = Gd, Tb, Dy, Ho) structural core and the investigation of the slow relaxation of the magnetization behaviour of the  $[\text{Fe}_2\text{Dy}]$  analogue**

Maria Savva,<sup>a</sup> Dimitris I. Alexandropoulos,<sup>a</sup> Michael Pissas,<sup>b</sup> Spyros P. Perlepes,<sup>c</sup> Constantina Papatriantafyllopoulou,<sup>\*a†</sup> Yiannis Sanakis,<sup>\*b</sup> Anastasios J. Tasiopoulos<sup>\*a</sup>

<sup>a</sup>*Department of Chemistry, University of Cyprus, 1678 Nicosia, Cyprus.*

*E-mail: [atasio@ucy.ac.cy](mailto:atasio@ucy.ac.cy)*

<sup>b</sup>*Institute of Nanoscience and Nanotechnology, NCSR “Demokritos”, 15341 Aghia Paraskevi, Athens, Greece. E-mail: [i.sanakis@inn.demokritos.gr](mailto:i.sanakis@inn.demokritos.gr)*

<sup>c</sup>*Department of Chemistry, University of Patras, 26504 Patras, Greece.*

<sup>†</sup>*Current address: School of Biological and Chemical Sciences, College of Science and Engineering, University of Galway, University Road, H91 TK33 Galway, Ireland. E-mail: [constantina.papatriantafyllopo@universityofgalway.ie](mailto:constantina.papatriantafyllopo@universityofgalway.ie)*

## Table of Contents

|                                                     |           |
|-----------------------------------------------------|-----------|
| <b>SINGLE CRYSTAL X-RAY CRYSTALLOGRAPHY .....</b>   | <b>3</b>  |
| <b>PHYSICAL MEASUREMENTS/CHARACTERIZATION .....</b> | <b>6</b>  |
| <b>MAGNETIC MEASUREMENTS .....</b>                  | <b>9</b>  |
| <b>MÖSSBAUER SPECTROSCOPY .....</b>                 | <b>11</b> |
| <b>REFERENCES:.....</b>                             | <b>13</b> |

## Single crystal X-Ray crystallography

**Table S1.** Crystal data and structural refinement parameters for compounds **1·MeCN/Gd**, **1·MeCN/Tb**, **1·MeCN/Dy** and **1·MeCN/Ho**

| Identification code                       | 1·MeCN/Gd                                                                          | 1·MeCN/Tb                                                                          | 1·MeCN/Dy                                                                          | 1·MeCN/Ho                                                                          |
|-------------------------------------------|------------------------------------------------------------------------------------|------------------------------------------------------------------------------------|------------------------------------------------------------------------------------|------------------------------------------------------------------------------------|
| Empirical formula                         | C <sub>58</sub> H <sub>48</sub> ClGdFe <sub>2</sub> N <sub>8</sub> O <sub>15</sub> | C <sub>58</sub> H <sub>48</sub> ClTbFe <sub>2</sub> N <sub>8</sub> O <sub>15</sub> | C <sub>56</sub> H <sub>45</sub> ClDyFe <sub>2</sub> N <sub>7</sub> O <sub>15</sub> | C <sub>58</sub> H <sub>48</sub> ClHoFe <sub>2</sub> N <sub>8</sub> O <sub>15</sub> |
| Formula weight                            | 1401.44                                                                            | 1403.11                                                                            | 1365.64                                                                            | 1409.12                                                                            |
| Temperature / K                           | 104.3(6)                                                                           | 105(4)                                                                             | 105(2)                                                                             | 104(1)                                                                             |
| Wavelength / Å                            | 1.54184                                                                            | 1.54184                                                                            | 1.54184                                                                            | 1.54184                                                                            |
| Crystal system                            | Monoclinic                                                                         | Monoclinic                                                                         | Monoclinic                                                                         | Monoclinic                                                                         |
| Space group                               | C 2/c                                                                              | C 2/c                                                                              | C 2/c                                                                              | C 2/c                                                                              |
| a/Å                                       | 36.202 (2)                                                                         | 36.2532(8)                                                                         | 36.1248(7)                                                                         | 36.162 (2)                                                                         |
| b/Å                                       | 13.6502(5)                                                                         | 13.6224(3)                                                                         | 13.6090(3)                                                                         | 13.6340(5)                                                                         |
| c/Å                                       | 23.4533(7)                                                                         | 23.4474(4)                                                                         | 23.3954(4)                                                                         | 23.3820(6)                                                                         |
| β/°                                       | 94.603(3)                                                                          | 94.717(2)                                                                          | 94.628(2)                                                                          | 94.710(3)                                                                          |
| Volume / Å <sup>3</sup>                   | 11552.6(7)                                                                         | 11540.4(4)                                                                         | 11464.2(4)                                                                         | 11489.2(6)                                                                         |
| Z                                         | 8                                                                                  | 8                                                                                  | 8                                                                                  | 8                                                                                  |
| Density (calculated) / Mg/m <sup>3</sup>  | 1.612                                                                              | 1.615                                                                              | 1.582                                                                              | 1.629                                                                              |
| Absorption coefficient / mm <sup>-1</sup> | 12.356                                                                             | 10.962                                                                             | 11.917                                                                             | 7.529                                                                              |
| F(000)                                    | 5640                                                                               | 5648                                                                               | 5480                                                                               | 5664                                                                               |
| Crystal size / mm <sup>3</sup>            | 0.13 x 0.04 x 0.02                                                                 | 0.28 x 0.03 x 0.02                                                                 | 0.08 x 0.016 x 0.011                                                               | 0.09 x 0.013 x 0.010                                                               |
| Theta range for data collection / °       | 3.462 to 66.991                                                                    | 3.783 to 66.999                                                                    | 3.472 to 66.993                                                                    | 3.466 to 66.997                                                                    |
|                                           | -28 ≤ h ≤ 43                                                                       | -43 ≤ h ≤ 43                                                                       | -37 ≤ h ≤ 43                                                                       | -42 ≤ h ≤ 43                                                                       |
| Index ranges                              | -14 ≤ k ≤ 16                                                                       | -16 ≤ k ≤ 16                                                                       | -16 ≤ k ≤ 16                                                                       | -16 ≤ k ≤ 15                                                                       |
|                                           | -28 ≤ l ≤ 27                                                                       | -22 ≤ l ≤ 27                                                                       | -27 ≤ l ≤ 27                                                                       | -27 ≤ l ≤ 19                                                                       |
| Reflections collected                     | 21252                                                                              | 21089                                                                              | 22211                                                                              | 20925                                                                              |
| Independent reflections / R(int)          | 10272 /<br>[R(int) = 0.0428]                                                       | 10250 /<br>[R(int) = 0.0317]                                                       | 10183 /<br>[R(int) = 0.0322]                                                       | 10213 /<br>[R(int) = 0.0377]                                                       |

|                                                       |                                        |                                        |                                        |                                        |
|-------------------------------------------------------|----------------------------------------|----------------------------------------|----------------------------------------|----------------------------------------|
| Reflections with $I > 2\sigma(I)$                     | 8520                                   | 8952                                   | 8668                                   | 8151                                   |
| Completeness to theta =<br>66.99° / %                 | 99.8                                   | 99.7                                   | 99.8                                   | 99.8                                   |
| Absorption correction                                 | Semi-empirical<br>from equivalents     | Semi-empirical<br>from equivalents     | Semi-empirical<br>from equivalents     | Semi-empirical<br>from equivalents     |
| Refinement method                                     | Full-matrix least-<br>squares on $F^2$ |
| Data / restraints /<br>parameters                     | 10272 / 0 / 767                        | 10250 / 0 / 767                        | 10183 / 0 / 739                        | 10213 / 0 / 767                        |
| Goodness-of-fit on $F^2$                              | 0.979                                  | 1.054                                  | 1.004                                  | 1.028                                  |
| Final R indices<br>[ $I > 2\sigma(I)$ ]               | $R_1^a = 0.0463$<br>$wR_2^b = 0.1221$  | $R_1 = 0.0390$<br>$wR_2 = 0.1097$      | $R_1 = 0.0366$<br>$wR_2 = 0.0983$      | $R_1 = 0.0468$<br>$wR_2 = 0.1251$      |
| R indices (all data)                                  | $R_1 = 0.0574$<br>$wR_2 = 0.1293$      | $R_1 = 0.0452$<br>$wR_2 = 0.1146$      | $R_1 = 0.0456$<br>$wR_2 = 0.1033$      | $R_1 = 0.0621$<br>$wR_2 = 0.1338$      |
| Largest diff. peak and<br>hole / $e \text{ \AA}^{-3}$ | 1.208 and -0.701                       | 0.831 and -1.125                       | 0.797 and -0.688                       | 0.832 and -1.094                       |

<sup>a</sup>  $R_1 = \sum(|F_o| - |F_c|) / \sum |F_o|$ . <sup>b</sup>  $wR_2 = [\sum[w(F_o^2 - F_c^2)^2] / \sum[w(F_o^2)^2]]^{1/2}$ ,  $w = 1 / [\sigma^2(F_o^2) + [(ap)^2 + bp]$ , where  $p = [\max(F_o^2, 0) + 2F_c^2] / 3$ .

**Table S2.** Shape measures of the 9-coordinate Gd1 – Ho1 coordination polyhedra in **1·MeCN/Gd**, **1·MeCN/Tb**, **1·MeCN/Dy** and **1·MeCN/Ho**, respectively

| Polyhedron <sup>a</sup> | Gd1         | Tb1         | Dy1         | Ho1         |
|-------------------------|-------------|-------------|-------------|-------------|
| EP-9                    | 34.68       | 34.83       | 34.81       | 34.82       |
| OPY-9                   | 22.63       | 22.63       | 22.45       | 22.32       |
| HBPY-9                  | 18.33       | 18.37       | 18.55       | 18.54       |
| JTC-9                   | 14.65       | 14.59       | 14.60       | 14.65       |
| JCCU-9                  | 10.11       | 10.00       | 10.01       | 9.96        |
| CCU-9                   | 9.34        | 9.25        | 9.30        | 9.23        |
| JCSAPR-9                | 2.42        | 2.34        | 2.26        | 2.22        |
| CSAPR-9                 | <b>1.67</b> | <b>1.62</b> | <b>1.57</b> | <b>1.52</b> |
| JTCTPR-9                | 3.76        | 3.68        | 3.59        | 3.51        |
| TCTPR-9                 | 2.09        | 2.05        | 1.99        | 1.91        |
| JTDIC-9                 | 10.70       | 10.83       | 10.91       | 10.90       |
| HH-9                    | 10.75       | 10.82       | 10.88       | 10.93       |
| MFF-9                   | 1.87        | 1.82        | 1.79        | 1.75        |

<sup>a</sup> Abbreviations: EP-9, enneagon; OPY-9, octagonal pyramid; HBPY-9, heptagonal bipyramid; JTC-9, Johnson triangular cupola J3; JCCU-9, capped cube J8; CCU-9, spherical-relaxed capped cube; JCSAPR-9, capped square antiprism J10; CSAPR-9, spherical capped square antiprism; JTCTPR-9, tricapped trigonal prism J51; TCTPR-9, spherical tricapped trigonal prism; JTDIC-9, tridiminished icosahedron J63; HH-9, hula-hoop; MFF-9, muffin. The values in boldface indicate the closest polyhedron according to the Continuous Shape Measures.

## Physical Measurements/Characterization

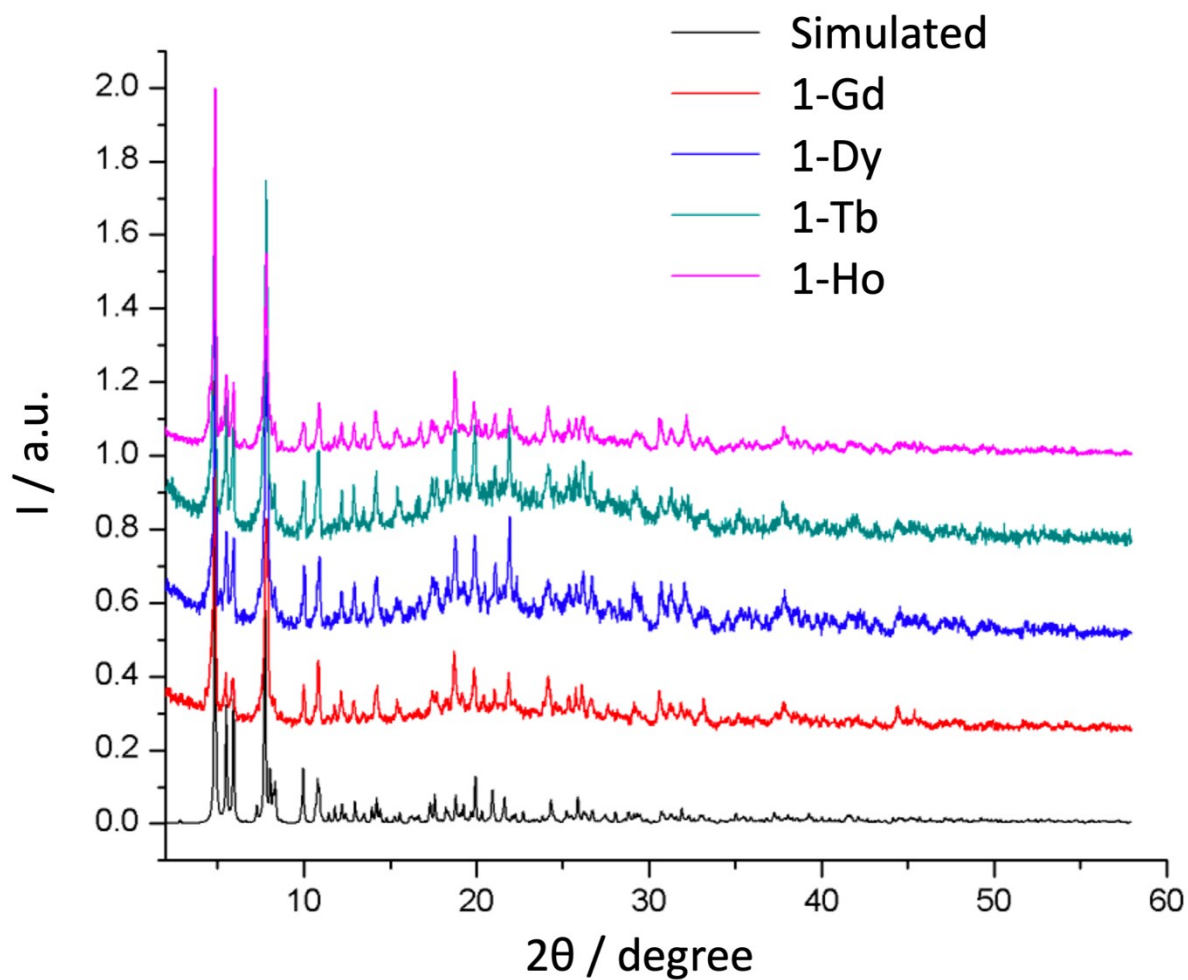

**Fig. S1.** Powder X-ray diffraction patterns of compounds **1**·MeCN/Gd, **1**·MeCN/Tb, **1**·MeCN/Dy and **1**·MeCN/Ho, along with the simulated pattern from the single crystal data.

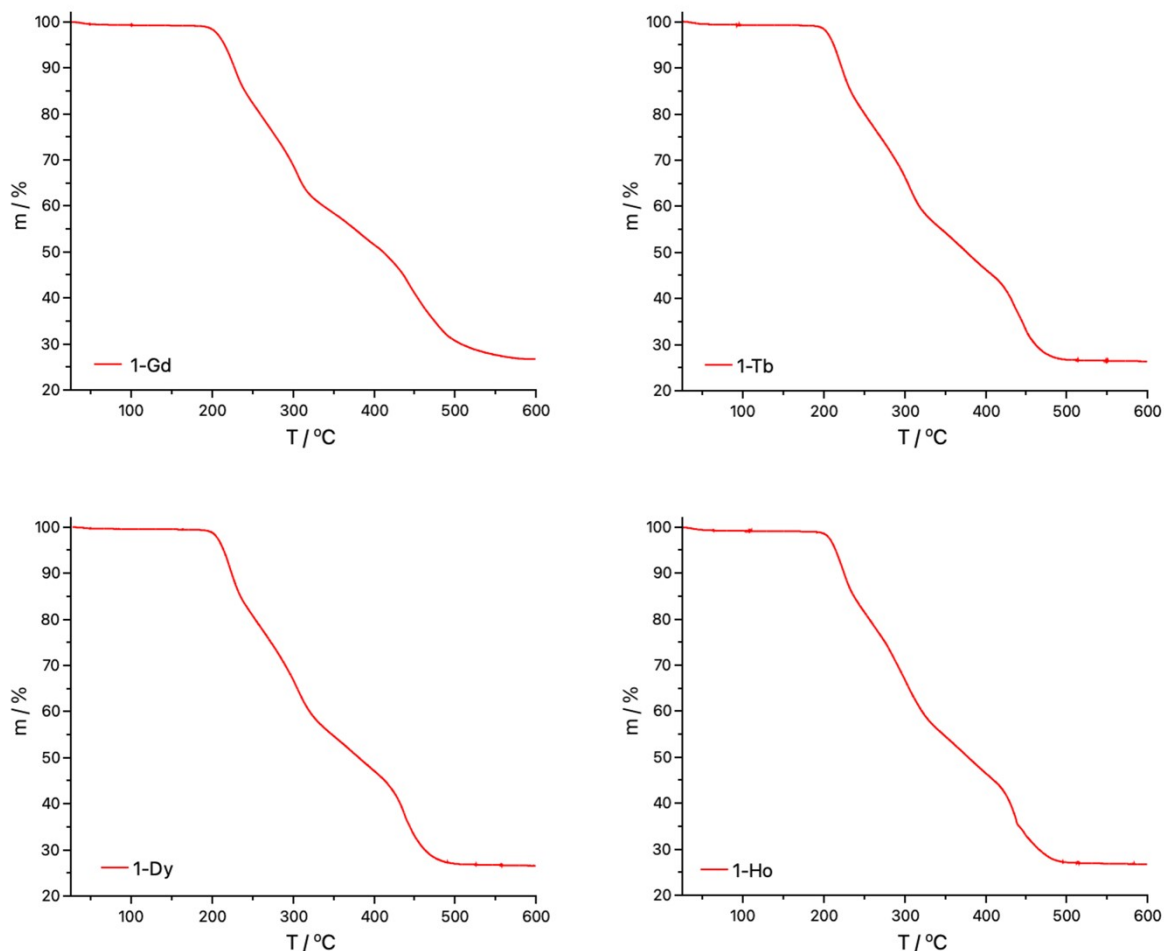

**Fig. S2.** TGA graphs of compounds **1**·MeCN/Gd, **1**·MeCN /Tb, **1**·MeCN/Dy and **1**·MeCN/Ho. TGA analysis reveals that the thermal decomposition of the compounds proceeds through multistep processes which are completed at  $\sim 600$  °C. The removal of the lattice solvent molecule is completed at  $\sim 210$  °C and corresponds to  $\sim 2.7$ - $2.9\%$  of the materials' total mass. These values are in agreement with the corresponding calculated values for the removal of one MeCN solvent molecule from the four analogous compounds ( $2.9\%$ ; see Table S3). The combustion of the coordinated molecules of the four analogues of **1**·MeCN/Ln (Ln = Gd, Tb, Dy, Ho) takes places through multistep processes which are completed at  $\sim 600$  °C and accounts to  $\sim 71.9$ - $72.1\%$  loss of their initial mass (calculated  $\sim 72.3$ - $72.7\%$ ). The final residue is assigned to  $\text{Fe}_2\text{O}_3/0.5 \text{Ln}_2\text{O}_3$  (Ln = Gd, Dy, Ho) or  $\text{Fe}_2\text{O}_3/0.25 \text{Tb}_4\text{O}_7$  (calculated residue =  $24.3$ - $24.8\%$ , found =  $\sim 25.2$ - $25.3\%$ ).

**Table S3.** Calculated values for percentage mass loss of solvent removal and ligand combustion along with the experimental values obtained from TGA analysis of compounds **1·MeCN/Gd**, **1·MeCN/Tb**, **1·MeCN /Dy** and **1·MeCN /Ho**

| Removal of Lattice Solvents |                     |                                     |       | Ligand Combustion   |                                     | Residual Oxide(s)   |                                     |                                                                        |
|-----------------------------|---------------------|-------------------------------------|-------|---------------------|-------------------------------------|---------------------|-------------------------------------|------------------------------------------------------------------------|
| Compound                    | Temperature<br>(°C) | Experimental<br>(Calculated)<br>(%) | xMeCN | Temperature<br>(°C) | Experimental<br>(Calculated)<br>(%) | Temperature<br>(°C) | Experimental<br>(Calculated)<br>(%) | Formula                                                                |
| <b>1·MeCN</b><br><b>/Gd</b> | r.t.-210            | 2.8 (2.9)                           | 1     | 210-600             | 71.9 (72.7)                         | 600                 | 25.3 (24.3)                         | Fe <sub>2</sub> O <sub>3</sub> /0.5<br>Gd <sub>2</sub> O <sub>3</sub>  |
| <b>1·MeCN</b><br><b>/Tb</b> | r.t.-210            | 2.9 (2.9)                           | 1     | 210-600             | 71.9 (72.4)                         | 600                 | 25.2 (24.7)                         | Fe <sub>2</sub> O <sub>3</sub> /0.25<br>Tb <sub>4</sub> O <sub>7</sub> |
| <b>1·MeCN</b><br><b>/Dy</b> | r.t.-210            | 2.7 (2.9)                           | 1     | 210-600             | 72.1 (72.5)                         | 600                 | 25.2 (24.6)                         | Fe <sub>2</sub> O <sub>3</sub> /0.5<br>Dy <sub>2</sub> O <sub>3</sub>  |
| <b>1·MeCN</b><br><b>/Ho</b> | r.t.-210            | 2.7 (2.9)                           | 1     | 210-600             | 72 (72.3)                           | 600                 | 25.3 (24.8)                         | Fe <sub>2</sub> O <sub>3</sub> /0.5<br>Ho <sub>2</sub> O <sub>3</sub>  |



## Magnetic measurements

**Table S4.** Chemical formulae and  $J$  coupling constants of  $\text{Fe}^{3+}$  -  $\text{Gd}^{3+}$  magnetic exchange interactions for selected heterometallic  $\text{Fe}^{3+}/\text{Gd}^{3+}$  complexes.

| No | Complex <sup>a</sup>                                                                                                                            | $J_{\text{FeGd}}$ | Refs. |
|----|-------------------------------------------------------------------------------------------------------------------------------------------------|-------------------|-------|
| 1  | $\text{TBA}_3[\text{Fe}_3\text{Gd}_2(\text{N}_3)_{15}(\text{OH})_3(\text{tipaH}_3)_2]$                                                          | +0.267            | 1     |
| 2  | $[\{\text{Fe}(3\text{-MeOsalpn})\text{Gd}(\text{NO}_3)_3\}_2(\mu\text{-O})]$                                                                    | -3.25             | 2     |
| 3  | $[\text{Fe}_3\text{Ln}(\text{acac})_6(\text{tea})_2]$                                                                                           | +0.73             | 3     |
| 4  | $[\text{Fe}_2\text{Gd}_2(\mu_3\text{-OH})_2(\text{teaH})_2(\text{O}_2\text{CPh})_6]$                                                            | +0.18             | 4     |
| 5  | $[\text{Fe}_2\text{Gd}_2\text{O}(\text{OH})(\text{TBC}[4])_2(\text{DMF})_4(\text{MeOH})_2(\text{H}_2\text{O})_2]\text{Cl}$                      | -0.05             | 5     |
| 6  | $\text{Fe}_2\text{Gd}[\text{Fe}_2\text{Gd}(\text{L1})_2(\text{O}_2\text{CC}_3\text{H}_7)(\text{H}_2\text{O})]$                                  | +0.46             | 6     |
| 7  | $[\text{FeGd}(\text{bpca})_2(\text{NO}_3)_4]$                                                                                                   | -0.199            | 7     |
| 8  | $[\text{Fe}_4\text{Gd}_2(\text{teaH})_4(\text{N}_3)_7\{\text{O}_2\text{CC}(\text{CH}_3)_3\}_3]$                                                 | +0.4              | 8     |
| 9  | $[\text{Fe}_4\text{Gd}_2\{(\text{py})_2\text{CO}_2\}_4(\text{pdm})_2(\text{NO}_3)_2(\text{H}_2\text{O})_2\text{Cl}_4]$                          | -6.0 / +2.8       | 9     |
| 10 | $[\text{Fe}_2\text{Gd}_2(\text{L2})_2(\text{teaH})_2\text{Cl}_2](\text{NO}_3)_2]$                                                               | +0.84             | 10    |
| 11 | $[\text{Fe}_2\text{GdO}(\text{O}_2\text{CPh})_4(\text{dmem})_2(\text{NO}_3)]$                                                                   | +0.85             | 11    |
| 12 | $[\text{Fe}_2\text{Gd}_2(\text{L5H}_2)_4(\text{NO}_3)_2](\text{ClO}_4)_2]$                                                                      | +0.26             | 12    |
| 13 | $\text{Fe}_4\text{Gd}_2(\text{OH})_2(\text{N}_3)_2(\text{bdea})_4\{\text{O}_2\text{CC}(\text{CH}_3)_3\}_4(\text{NO}_3)_2]$                      | -0.38 / +0.20     | 13    |
| 14 | $[\{\text{Fe}_4(\text{dea})_4\text{Gd}_4(\text{deaH})_8(\mu_2\text{-OMe})_4\} \cdot (\text{NO}_3)_4]$                                           | +0.30 / +0.90     | 14    |
| 15 | $[\text{Fe}_2\text{Ln}(\text{O}_2\text{CPh})_3\{(\text{py})_2\text{CO}_2\}((\text{py})_2\text{C}(\text{OMe})\text{O})_2(\text{NO}_3)\text{Cl}]$ | +0.09             | t. w. |

<sup>a</sup>Lattice solvent molecules are omitted.

Abbreviations: t.w. = this work, TBA = tetrabutylammonium, tipaH<sub>3</sub> = triisopropanolamin, 3-MeOsalpn<sup>2-</sup> = N,N'-propylenebis(3-methoxysalicylideneimine), acacH, acetylacetone, teaH<sub>3</sub> = triethanolamine, HO<sub>2</sub>CPh = benzoic acid, TBC[4] = *p*-tert-Butylcalix[4]arene, L1H<sub>2</sub> = 2-hydroxy-3-methoxy-phenylsalicylalimine, HO<sub>2</sub>CC<sub>3</sub>H<sub>7</sub> = butyric acid, bpcaH = bis(2-pyridilcarbonyl)amine, HO<sub>2</sub>CC(CH<sub>3</sub>)<sub>3</sub> = pivalic acid, (py)<sub>2</sub>C(OH)<sub>2</sub> = gem-diol form of di-2-pyridyl ketone, pdmH<sub>2</sub> = pyridine-2,6-dimethanol, L2H<sub>2</sub> = N1,N3-bis(3-methoxysalicylidene)diethylenetriamine, L3H<sub>2</sub> = N,N'-bis(3-methoxysalicylidene)-1,3-diamino-2,2'-dimethyl-propane, L4H<sub>2</sub> = N,N'-bis(3-methoxysalicylidene)-1,2-diamino-2-methylpropane, dmemH = 2-[[2-(dimethylamino)ethyl]methylamino]ethanol, L5H<sub>4</sub> = (E)-2,2'-(2-hydroxy-3-((2-hydroxyphenylimino)methyl)-5-methylbenzylazanediyl)-diethanol, bdeaH<sub>2</sub> = N-butyl-diethanolamine.

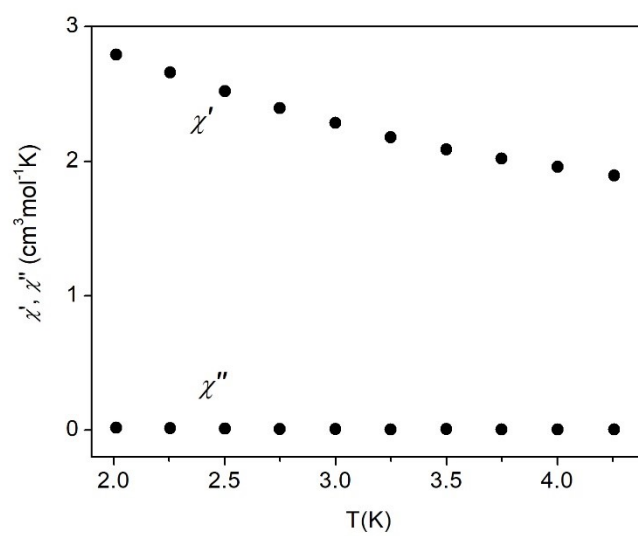

**Fig. S3.** Temperature dependence of  $\chi'$  and  $\chi''$  from a powdered sample of **1**·MeCN/Ho under a zero external magnetic field and at 5111 Hz.

## Mössbauer spectroscopy

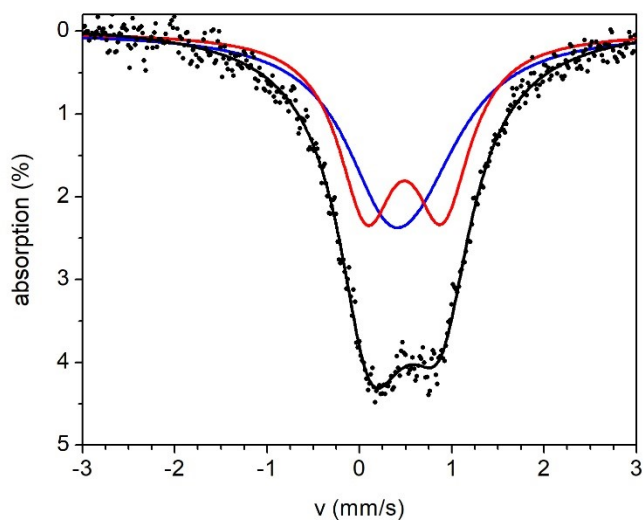

**Fig. S4.** Zero field Mössbauer spectra from a powder sample of **1**·MeCN/Gd at 80 K. Solid lines are theoretical spectra with the parameters listed in Table 2. Blue: doublet 1; red: doublet 2; black: sum.

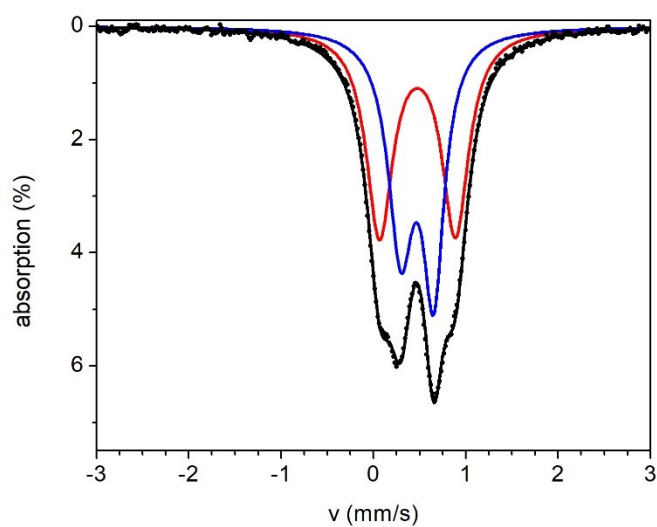

**Fig. S5.** Zero field Mössbauer spectra from a powder sample of **1**·MeCN/Tb at 80 K. Solid lines are theoretical spectra with the parameters listed in Table 2. Blue: doublet 1; red: doublet 2; black: sum.

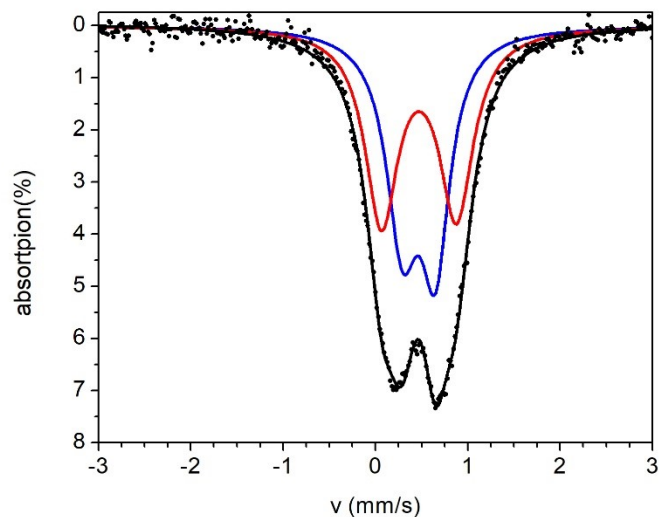

**Fig. S6.** Zero field Mössbauer spectra from a powder sample of **1·MeCN/Ho** at 80 K. Solid lines are theoretical spectra with the parameters listed in Table 2. Blue: doublet 1; red: doublet 2; black: sum.

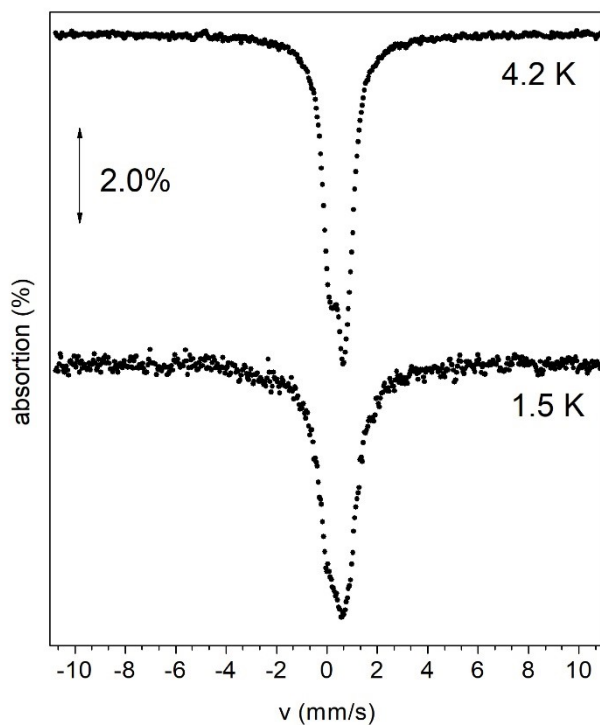

**Fig. S7.** Zero field Mossbauer spectra from powdered samples of **1·MeCN/Tb** at the indicated temperatures.

## References:

1. S. F. M. Schmidt, M. P. Merkel, G. E. Kostakis, G. Buth, C. E. Anson and A. K. Powell, *Dalton Transactions*, 2017, **46**, 15661-15665.
2. M. Sarwar, A. M. Madalan, F. Lloret, M. Julve and M. Andruh, *Polyhedron*, 2011, **30**, 2414-2420.
3. N. F. Chilton, S. K. Langley, B. Moubaraki and K. S. Murray, *Chemical Communications*, 2010, **46**, 7787-7789.
4. A. Baniodeh, Y. Lan, G. Novitchi, V. Mereacre, A. Sukhanov, M. Ferbinteanu, V. Voronkova, C. E. Anson and A. K. Powell, *Dalton Transactions*, 2013, **42**, 8926-8938.
5. S. Sanz, K. Ferreira, R. D. McIntosh, S. J. Dalgarno and E. K. Brechin, *Chemical Communications*, 2011, **47**, 9042-9044.
6. W.-W. Kuang, C.-Y. Shao and P.-P. Yang, *Journal of Coordination Chemistry*, 2015, **68**, 1412-1422.
7. M. Ferbinteanu, F. Cimpoesu, M. A. Gîrțu, C. Enachescu and S. Tanase, *Inorganic Chemistry*, 2012, **51**, 40-50.
8. S. F. M. Schmidt, C. Koo, V. Mereacre, J. Park, D. W. Heermann, V. Kataev, C. E. Anson, D. Prodius, G. Novitchi, R. Klingeler and A. K. Powell, *Inorganic Chemistry*, 2017, **56**, 4796-4806.
9. H.-S. Wang, Q.-Q. Long, Z.-B. Hu, L. Yue, F.-J. Yang, C.-L. Yin, Z.-Q. Pan, Y.-Q. Zhang and Y. Song, *Dalton Transactions*, 2019, **48**, 13472-13482.
10. H.-S. Wang, C.-L. Yin, Z.-B. Hu, Y. Chen, Z.-Q. Pan, Y. Song, Y.-Q. Zhang and Z.-C. Zhang, *Dalton Transactions*, 2019, **48**, 10011-10022.
11. N. Singh, S. Das Gupta, R. J. Butcher and G. Christou, *Dalton Transactions*, 2017, **46**, 7897-7903.
12. P. Bag, J. Goura, V. Mereacre, G. Novitchi, A. K. Powell and V. Chandrasekhar, *Dalton Transactions*, 2014, **43**, 16366-16376.
13. S. G. Baca, J. van Leusen, M. Speldrich and P. Kögerler, *Inorganic Chemistry Frontiers*, 2016, **3**, 1071-1075.
14. A. Mondal, M. Raizada, P. K. Sahu and S. Konar, *Inorganic Chemistry Frontiers*, 2021, **8**, 4625-4633.
